# Supplementary material for: FIND: difFerential chromatin INteractions Detection using a spatial Poisson process
Source: HighWire-hosted journal article supplement (doi:10.1101/gr.212241.116), 2018-02-12
Supplement: Supplemental_Fig_S7.pdf [file Supplemental_Fig_S7.pdf]

# Distance to diffrential 5C interaction between K562 and GM12878

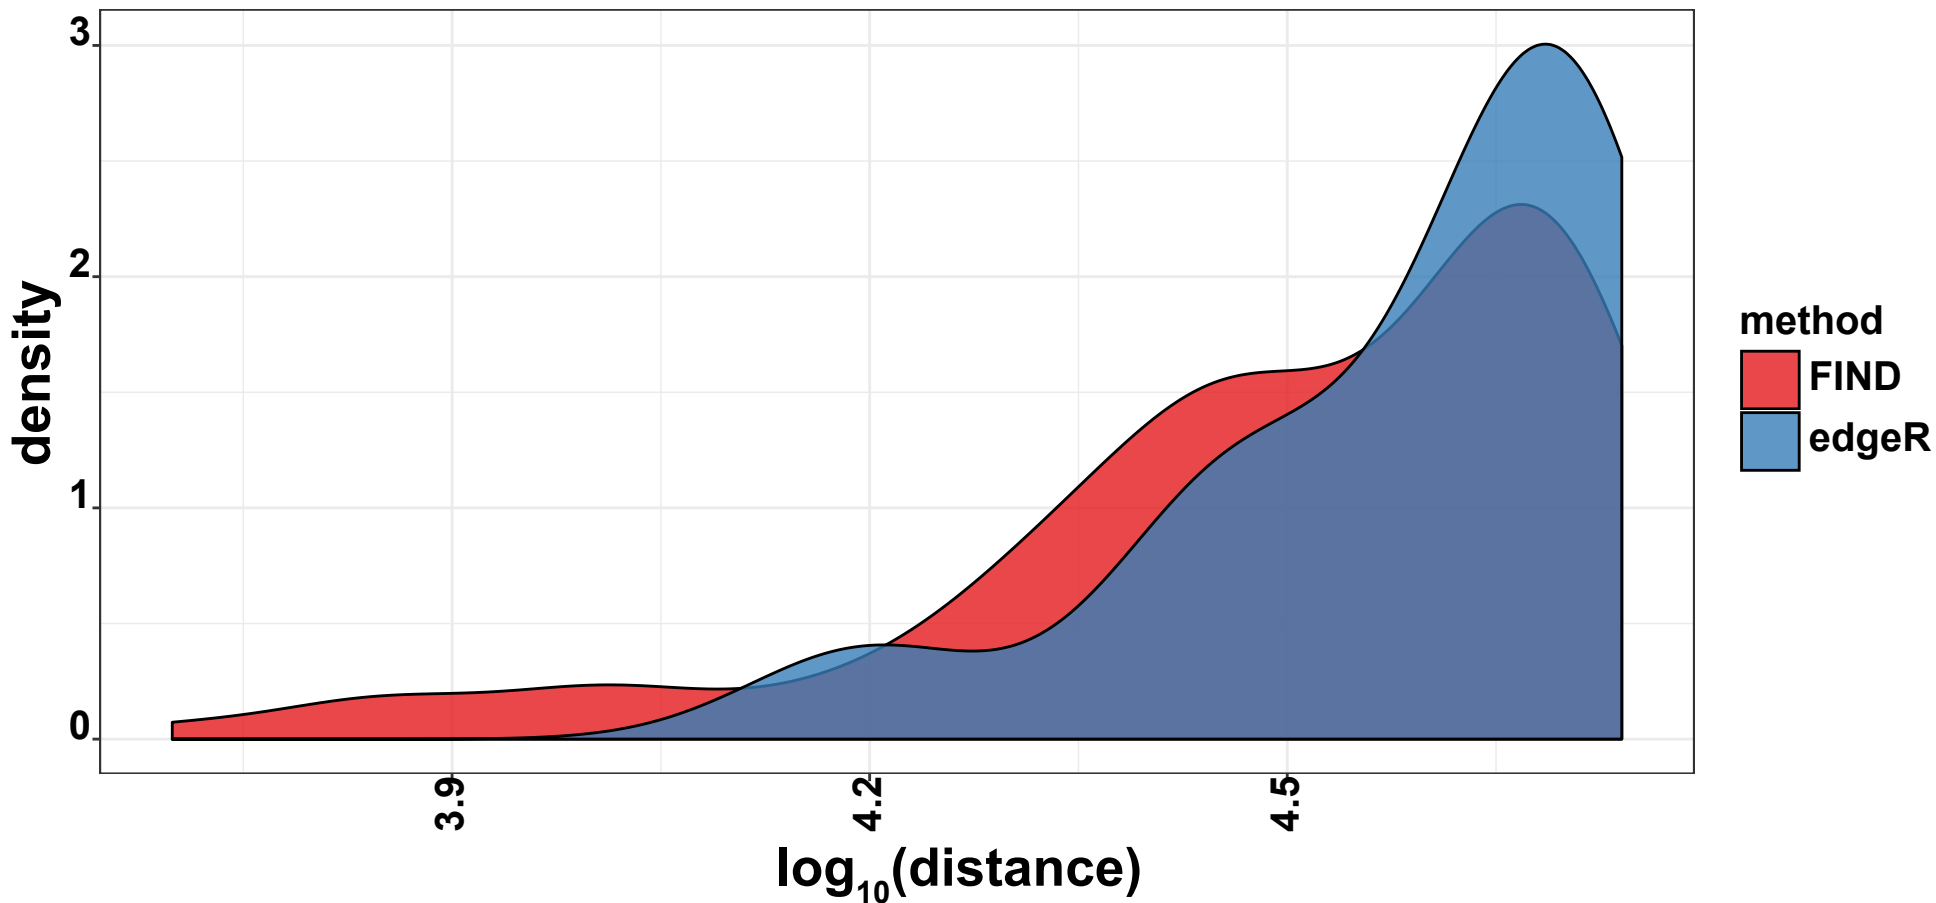

**Figure S7.** The distribution of the distance between the DCI detected by FIND and edgeR.
