# Supplementary material for: FIND: difFerential chromatin INteractions Detection using a spatial Poisson process
Source: HighWire-hosted journal article supplement (doi:10.1101/gr.212241.116), 2018-02-12
Supplement: Supplemental_Methods.docx [file Supplemental_Methods.docx]

# Supplementary Methods for :

**FIND: difFerential chromatin INteractions Detection using a spatial Poisson process**

**Mohamed Nadhir Djekidel1,** **Yang Chen1**§**, Michael Q. Zhang1,2** §

1MOE Key Laboratory of Bioinformatics and Bioinformatics Division, Center for Synthetic and System Biology, TNLIST/Department of Automation, Tsinghua University, Beijing 100084, China;

2 Department of Molecular and Cell Biology, Center for Systems Biology, The University of Texas, Dallas, 800 West Campbell Road, RL11 Richardson, TX 75080-3021, USA

**Principles of a spatial process**

A Spatial Point Process is a model that describes the distribution of points in a d-dimensional space. If R is a region and C is sub-region of R, then the probability of observing a point in C is , such that is the area of C. In a large reference area , and given points, the probability of observing a point in a unit of space is equal to:

|  |  | (1) |
| --- | --- | --- |

Then,

|  |  | (2) |
| --- | --- | --- |

Equation 2 is often referred to as the homogeneous spatial Poisson process.

**Testing the significance of the *k*th nearest neighbor intensity change:**

The *k*-nearest-neighbor intensity change test is based on the *k*-nearest-neighbor density estimator developed by Burguet et al (Burguet et al. 2009, 2011; Burguet and Andrey 2014). In this part, we summarize their main model. If we consider the Hi-C interactions in the 3D space, each interaction can be represented by the Cartesian coordinates , such that and are the genomic coordinates and is the interaction frequency. Then, from Burguet’s work, we know that for a given pairwise interaction with an interaction frequency , the probability of observing the nearest-neighbor at the distance from in the Hi-C replicate is:

|  |  | (3) |
| --- | --- | --- |

In equation 3, we can see that the only parameter that needs to be estimated is the density (u), written as for clarity. Given the a Hi-C matrix of the experimental condition with replicates, the density of the -th nearest-neighbor around the point can be estimated from the maximum likelihood of equation 2, which gives:

|  |  | (4) |
| --- | --- | --- |

If we make the variable change and replace its value in equation 4, we get:

|  |  | (5) |
| --- | --- | --- |

By replacing the value of in equation 4, we get

|  |  | (6) |
| --- | --- | --- |

Let Using equation 6, we get:

|  |  | (7) |
| --- | --- | --- |

Thus, let and be the -th-nearest-neighbor density at in the first and second conditions, respectively. Then, the ratio in equation 8 between and follows a Fisher-Snedor distribution.

|  |  | (8) |
| --- | --- | --- |

Then, under the null hypothesis , the ratio between the values for the-th nearest neighbour density around in the two biological conditions will be:

|  |  | (9) |
| --- | --- | --- |

Thus, given equation 9 and given a confidence level , the two-sided p-value that the estimated -th nearest neighbour density change around is significant will be equal to:

|  |  | (10) |
| --- | --- | --- |
