# Supplementary figures and images for: FIND: difFerential chromatin INteractions Detection using a spatial Poisson process
Source: HighWire-hosted journal article supplement (doi:10.1101/gr.212241.116), 2018-02-12

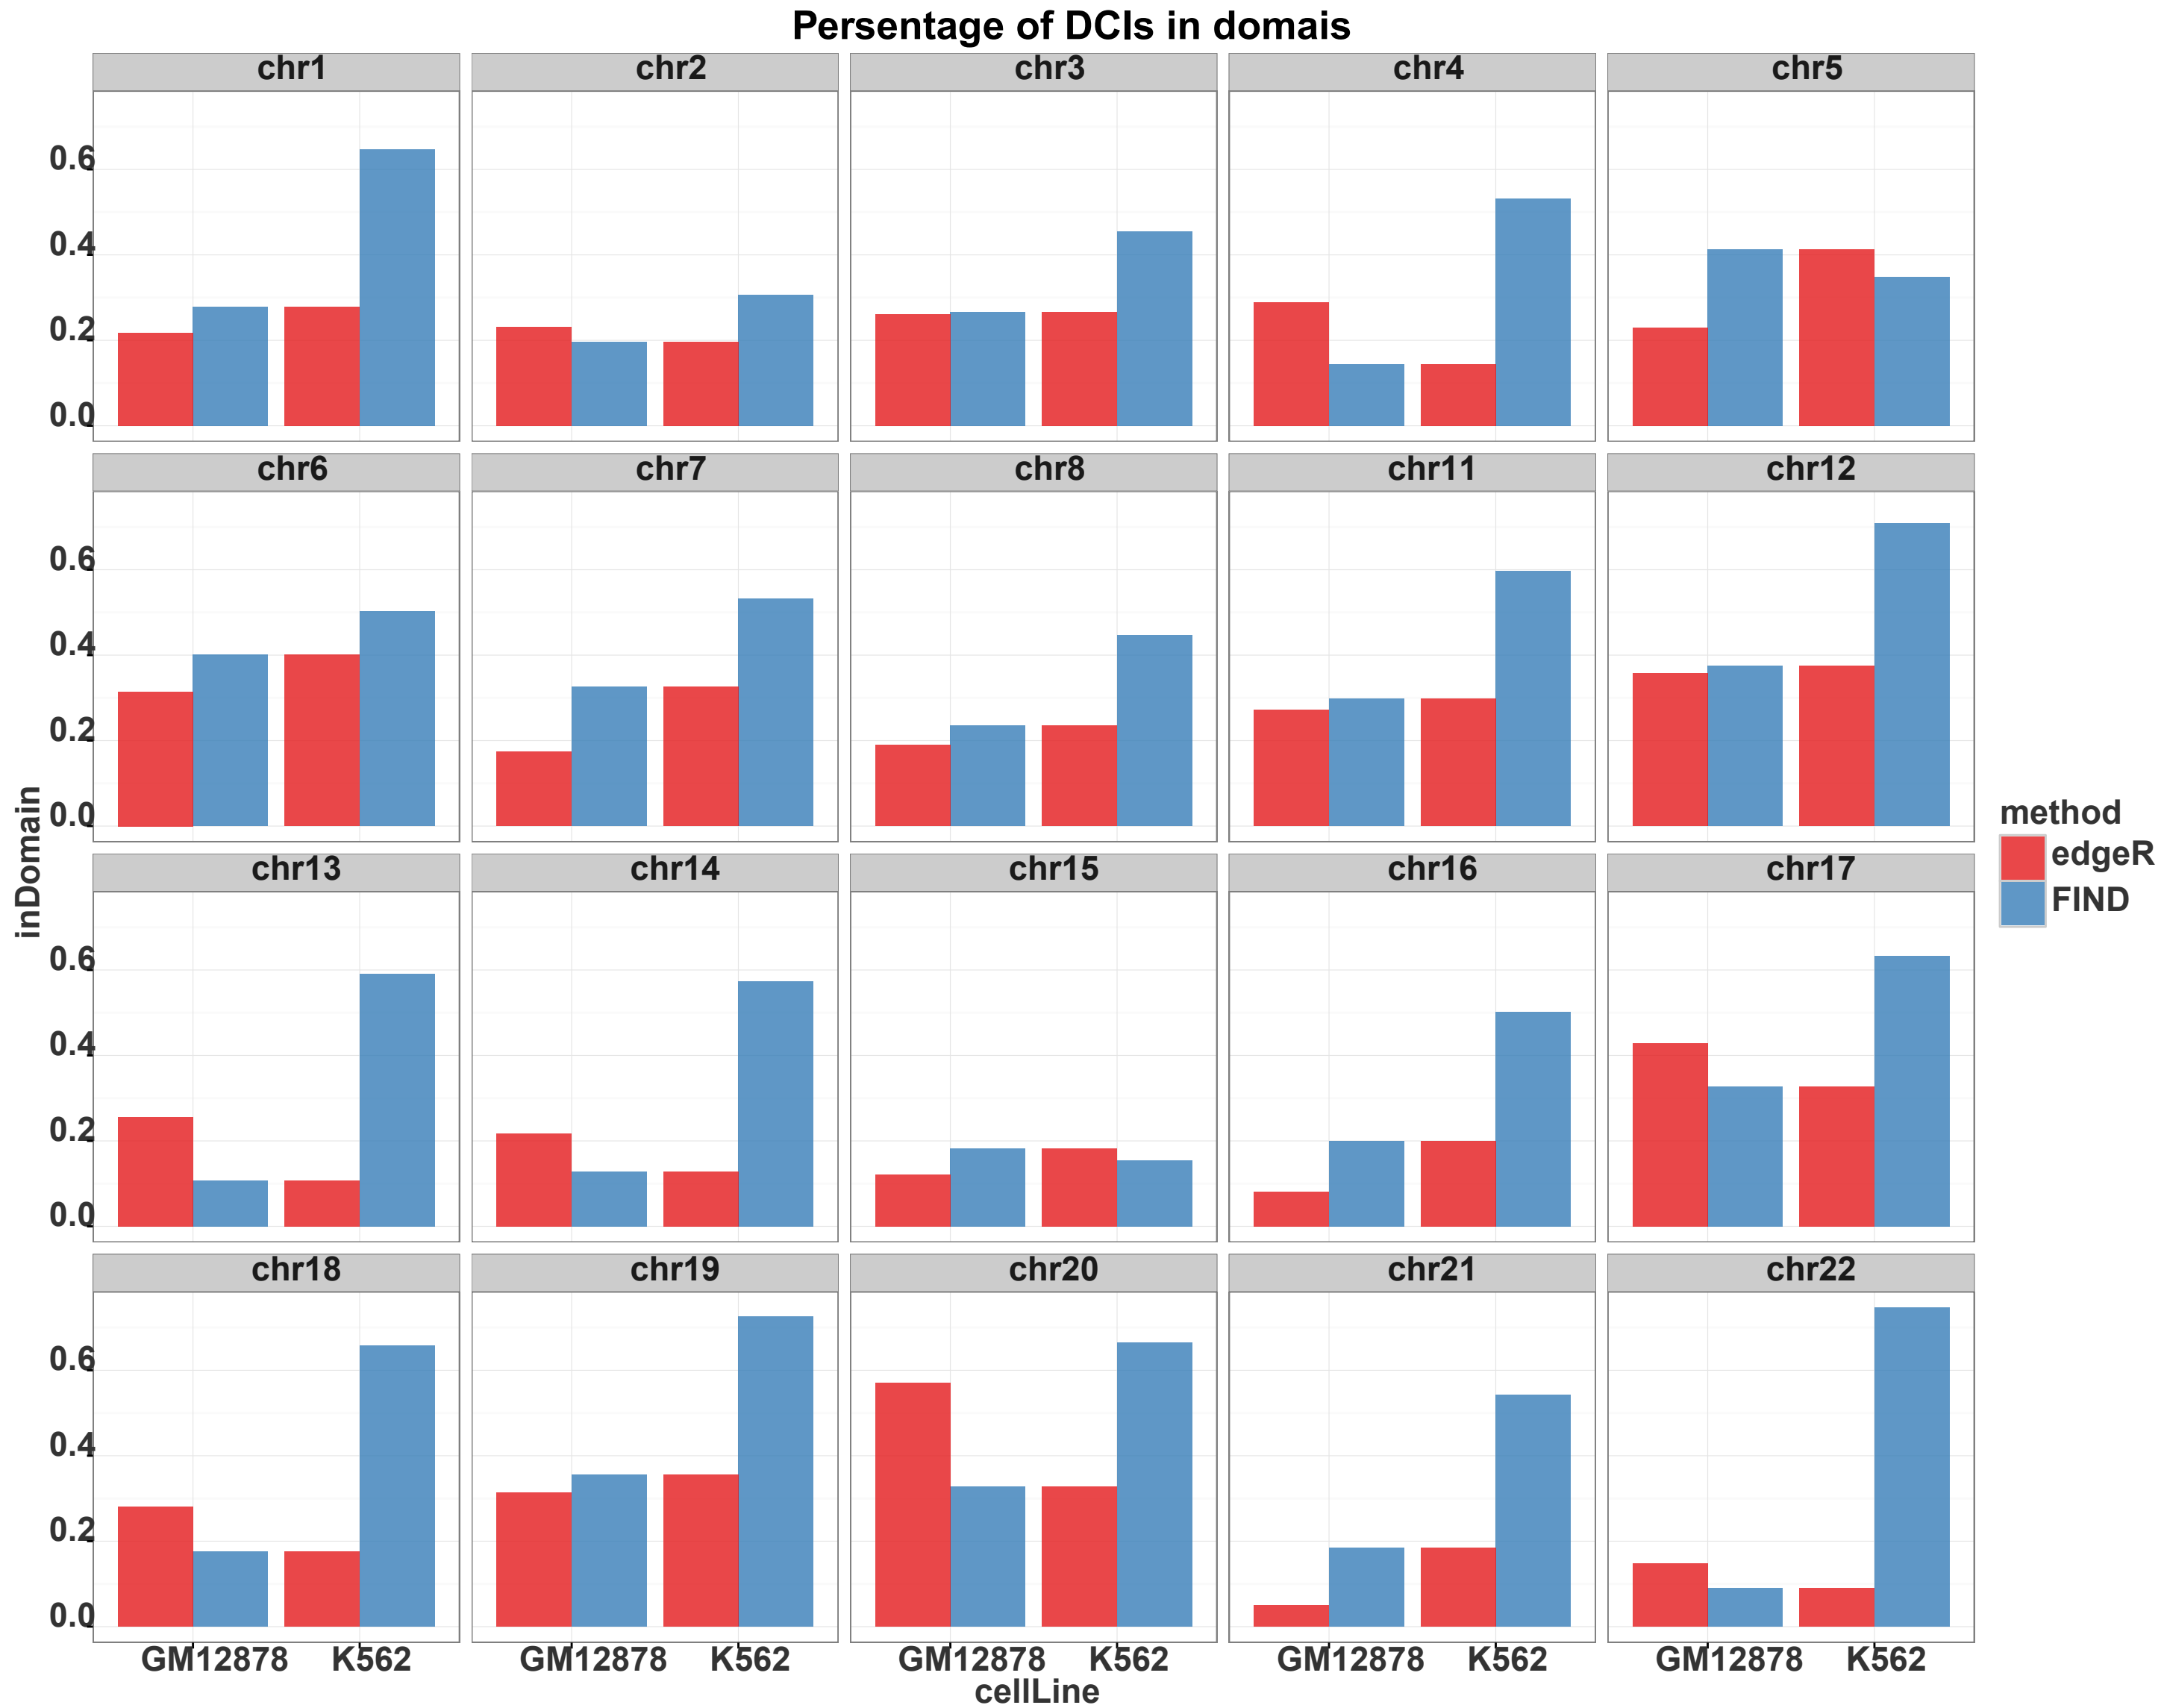

**Figure S5.** Comparison of the percentage of the DCI located within TADs between FIND and edgeR.

Supplement: Supplemental_Fig_S5.pdf [file Supplemental_Fig_S5.pdf]

1

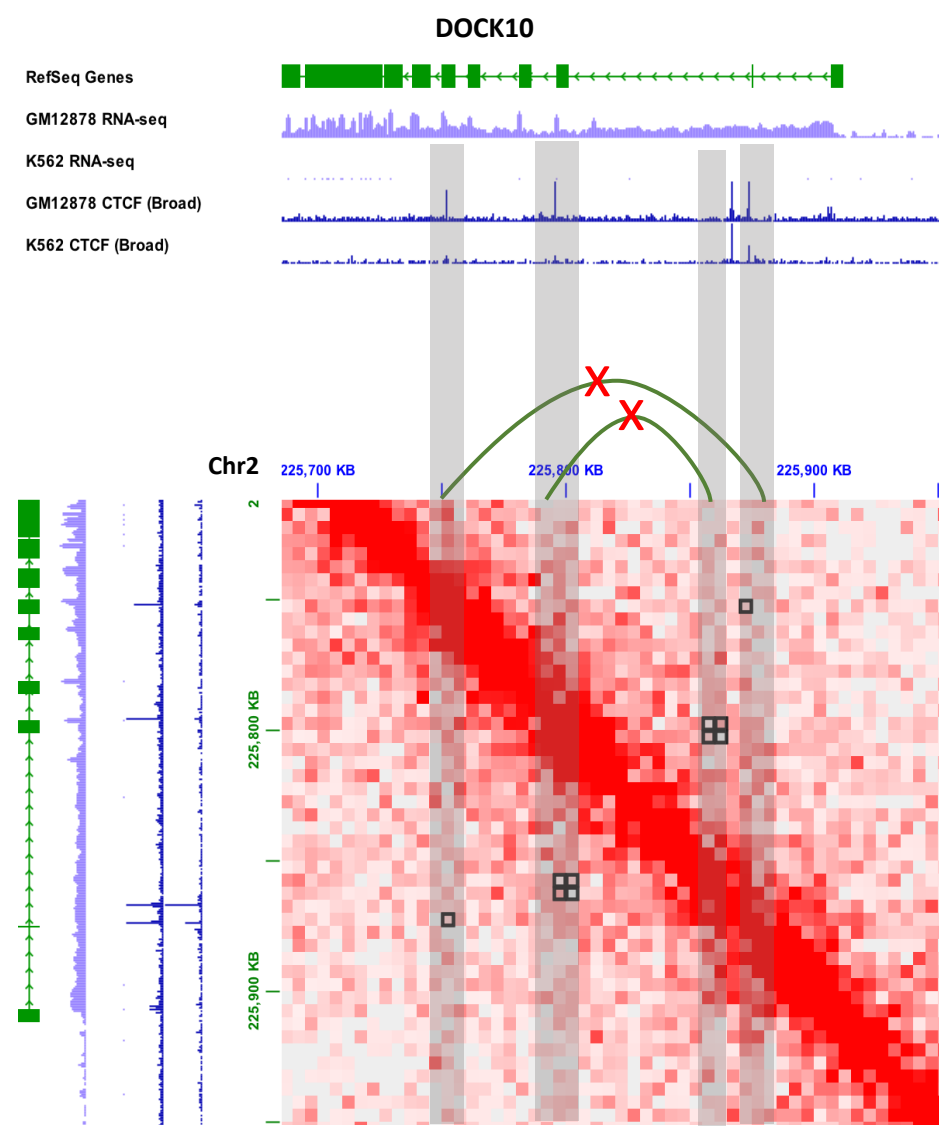

K562

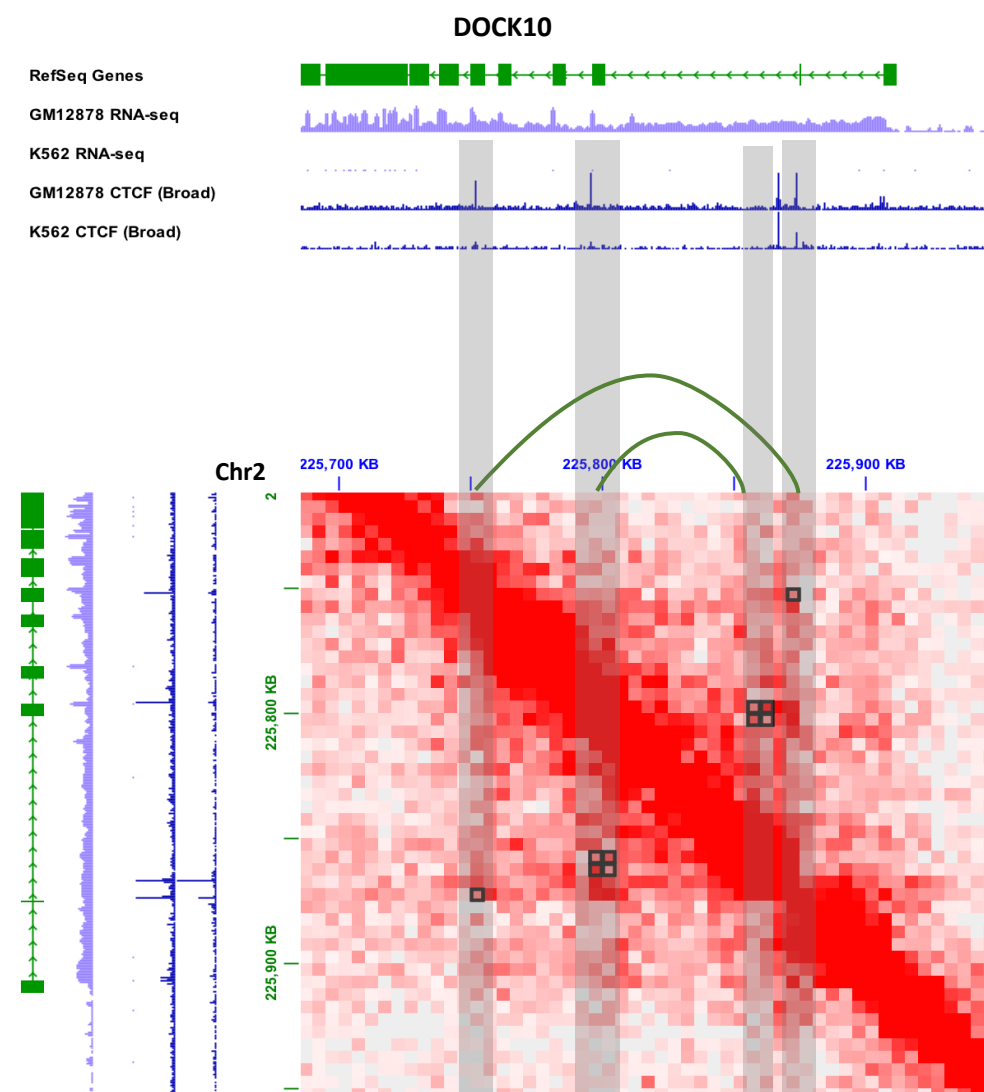

GM12878

2

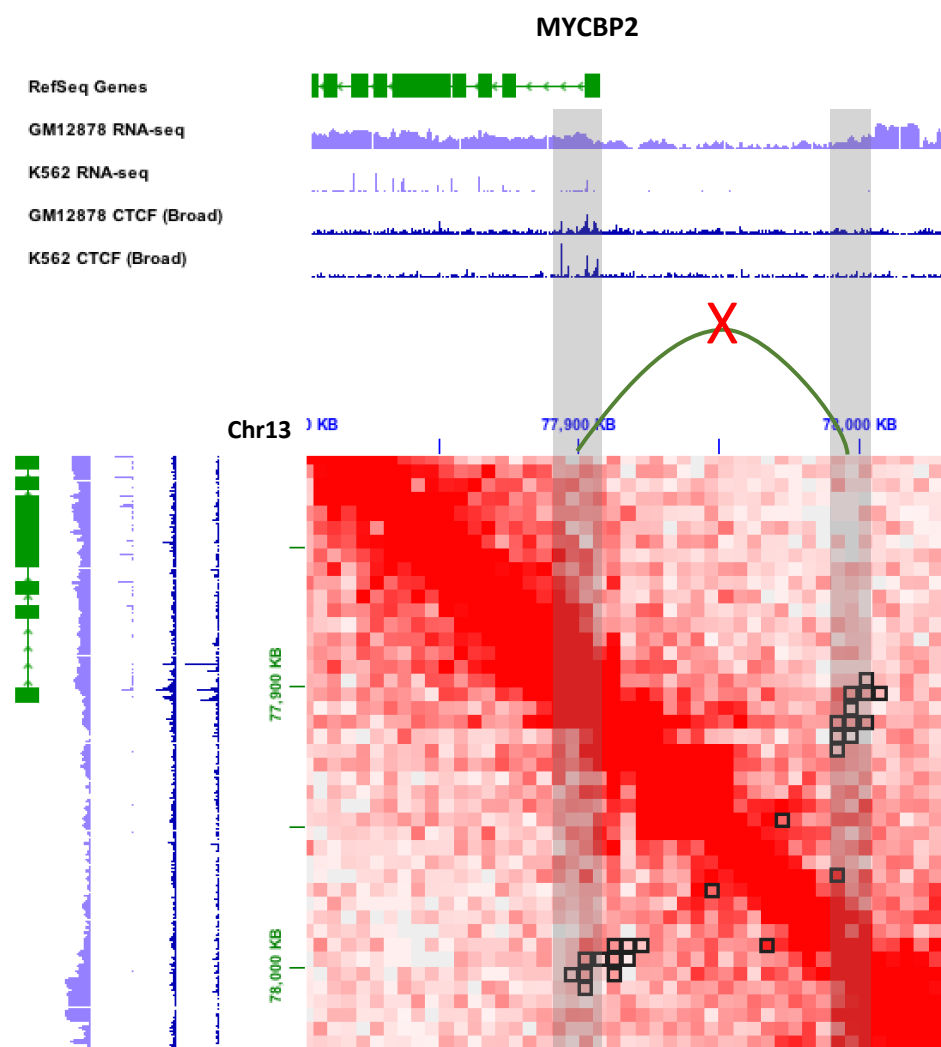

K562

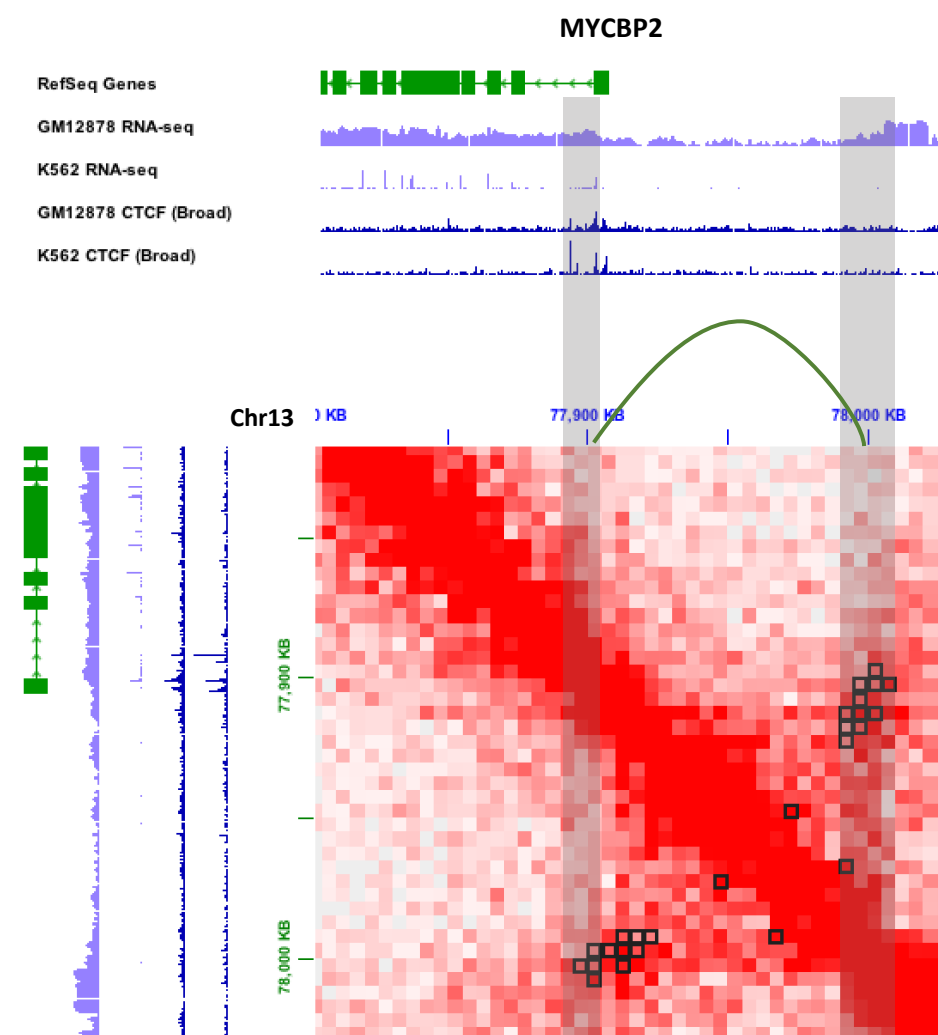

GM12878

**Figure S6.** Example of the some of the differential interactions detected by FIND.

Supplement: Supplemental_Fig_S6.pdf [file Supplemental_Fig_S6.pdf]
